# Supplementary material for: Proteomic Investigation of Falciparum and Vivax Malaria for Identification of Surrogate Protein Markers
Source: PubMed Central journal article supplement (PMC3415403; doi:10.1371/journal.pone.0041751), 2012-08-09
Supplement: pone.0041751.s004.pdf [file pone.0041751.s004.pdf]

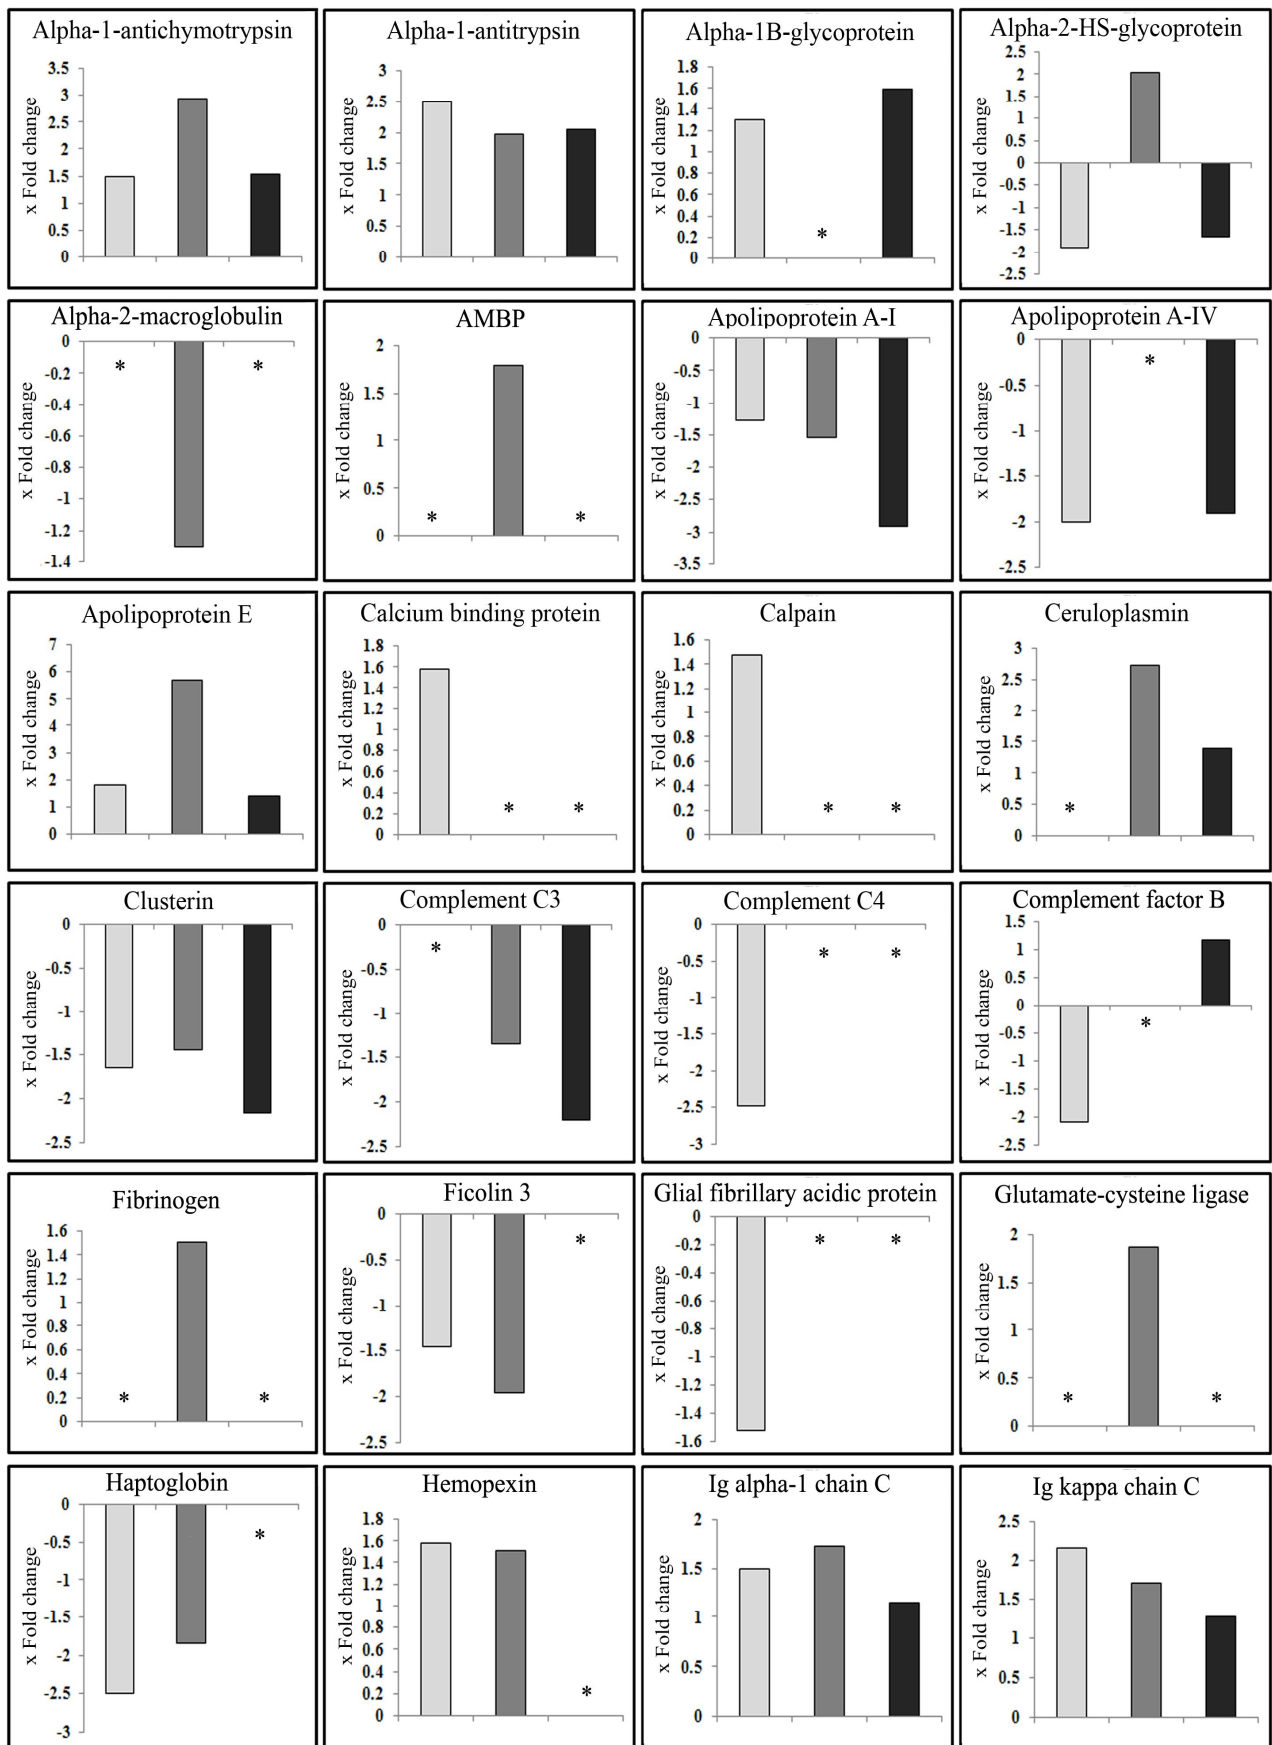

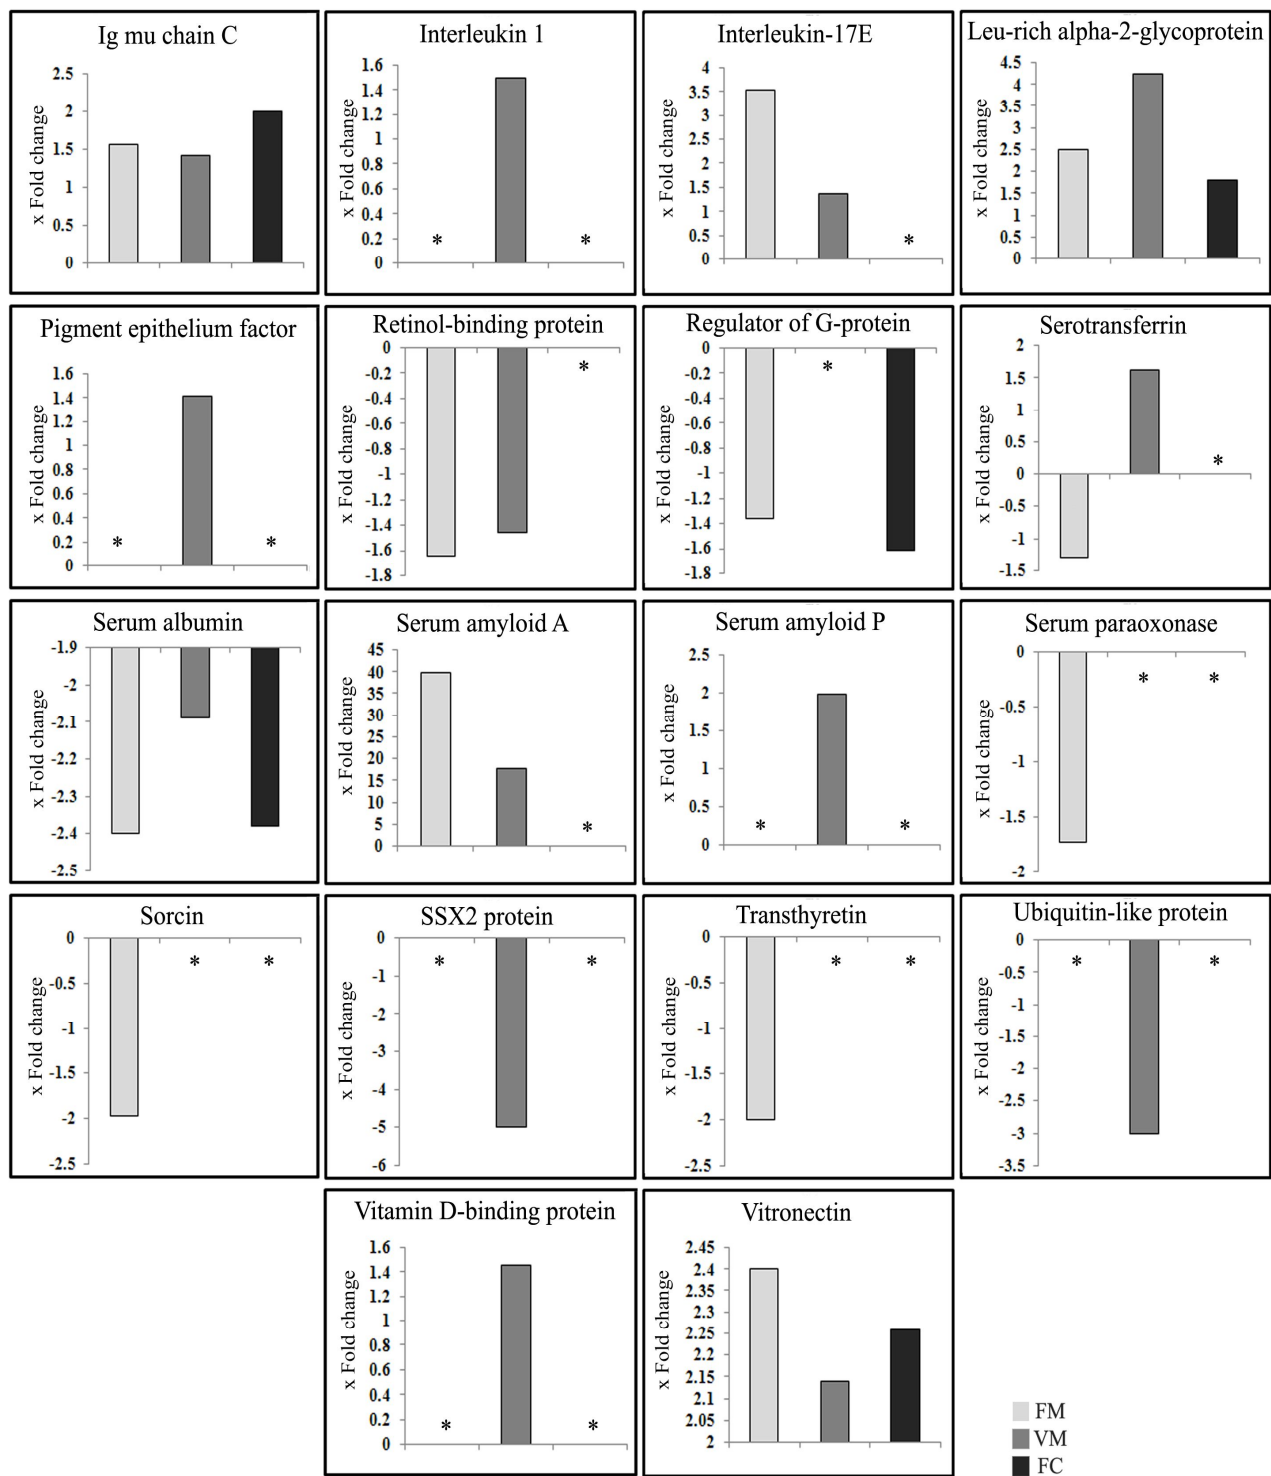

Figure S4
