# Supplementary material for: Proteomic Investigation of Falciparum and Vivax Malaria for Identification of Surrogate Protein Markers
Source: PLOS journal article supplement (doi:10.1371/journal.pone.0041751), 2012-08-09
Supplement: S9 (10.1371/journal.pone.0041751.s009) [file journal.pone.0041751.s009]

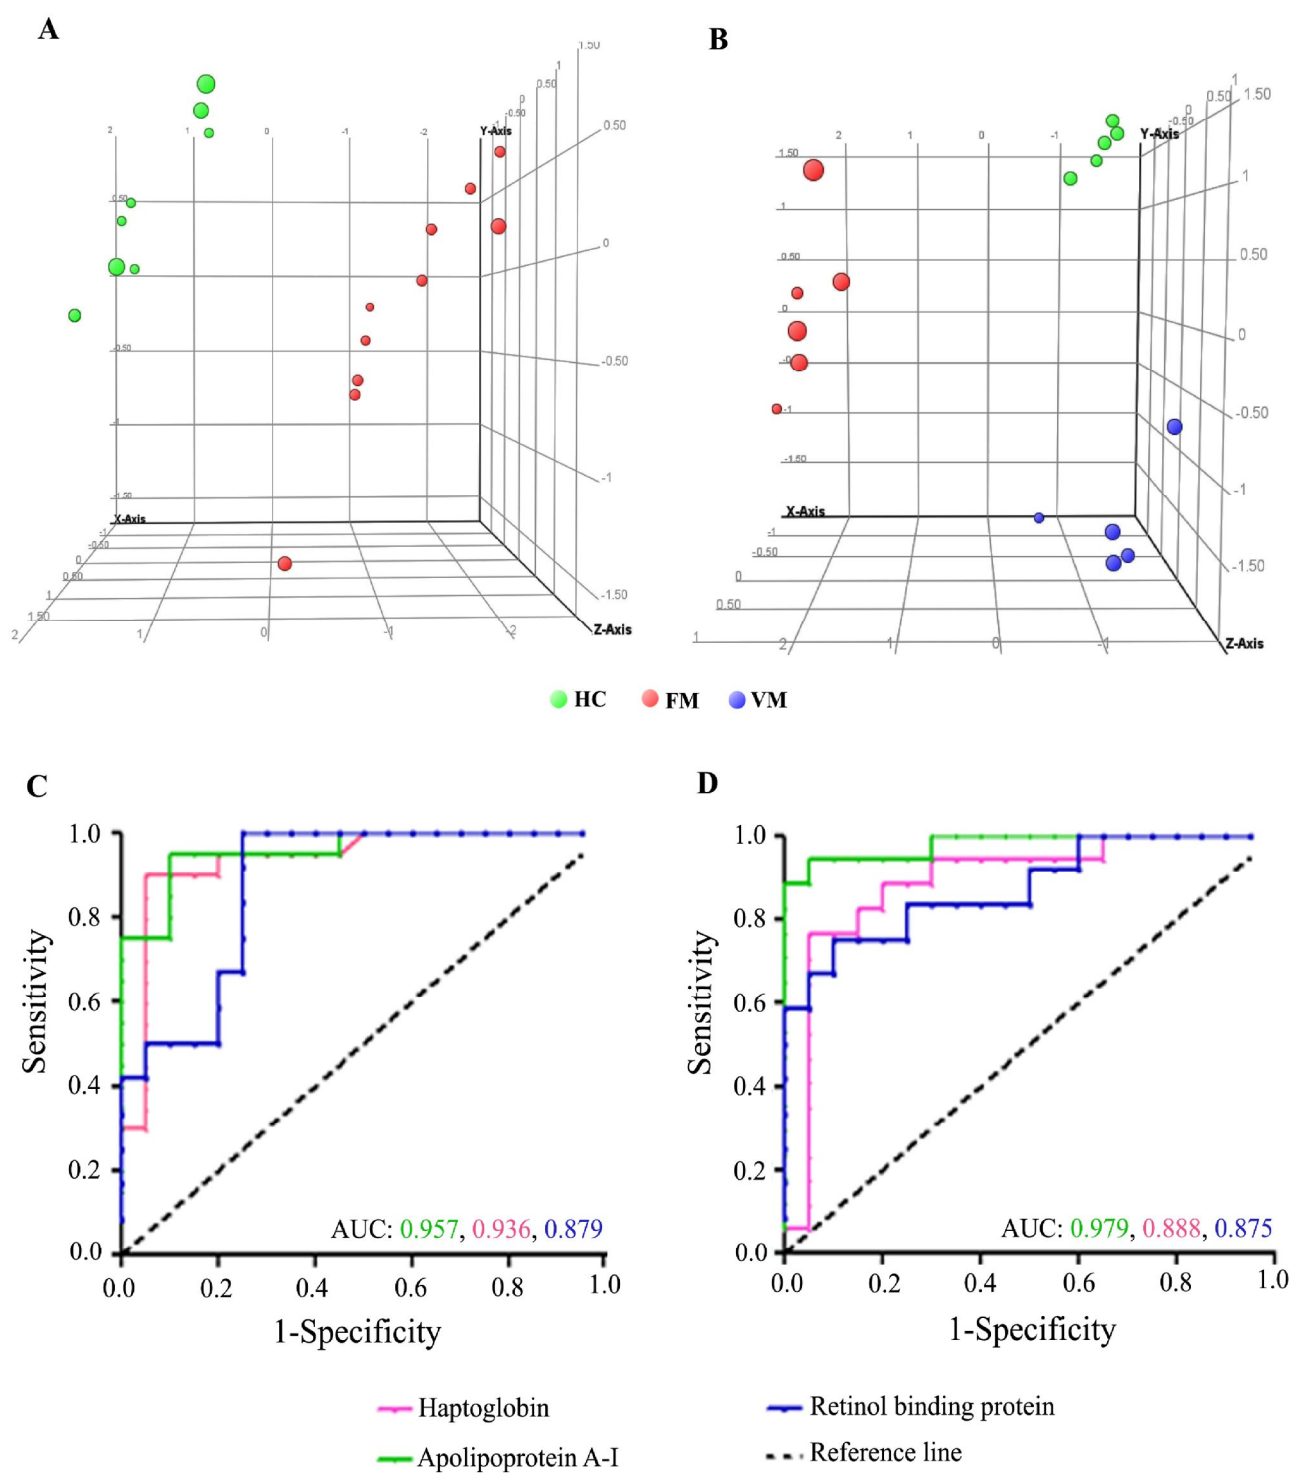

**Figure S9**
